# Supplementary material for: A CORM loaded nanoplatform for single NIR light-activated bioimaging, gas therapy, and photothermal therapy in vitro
Source: Royal Society of Chemistry journal article supplement (doi:10.1039/d1tb01561c), 2021-01-01
Supplement: d1tb01561c1.pdf [file d1tb01561c1.pdf]

## Supporting Information

### **CORMs loaded nanoplatform for the single NIR light-activated bioimaging, gas therapy, and photothermal therapy *in vitro***

**Shihao Pei,<sup>ab</sup> Jia-Bei Li,<sup>c</sup> Zhuo Wang,<sup>d</sup> Yao Xie,<sup>a</sup> Jiabo Chen,<sup>ab</sup> Haifang Wang<sup>\*c</sup> and Lining Sun<sup>\*ab</sup>**

<sup>a</sup> *Research Center of Nano Science and Technology, College of Science, Shanghai University, Shanghai 200444, China. Email: [lnsun@shu.edu.cn](mailto:lnsun@shu.edu.cn)*

<sup>b</sup> *Department of Chemistry, College of Science, Shanghai University, Shanghai 200444, China*

<sup>c</sup> *Institute of Nanochemistry and Nanobiology, School of Environmental and Chemical Engineering, Shanghai University, Shanghai 200444, China. Email: [hwang@shu.edu.cn](mailto:hwang@shu.edu.cn)*

<sup>d</sup> *State Key Laboratory of Marine Resource Utilization in South China Sea & Special Glass Key Lab of Hainan Province, School of Information and Communication Engineering, Hainan University, Haikou 570228, China*

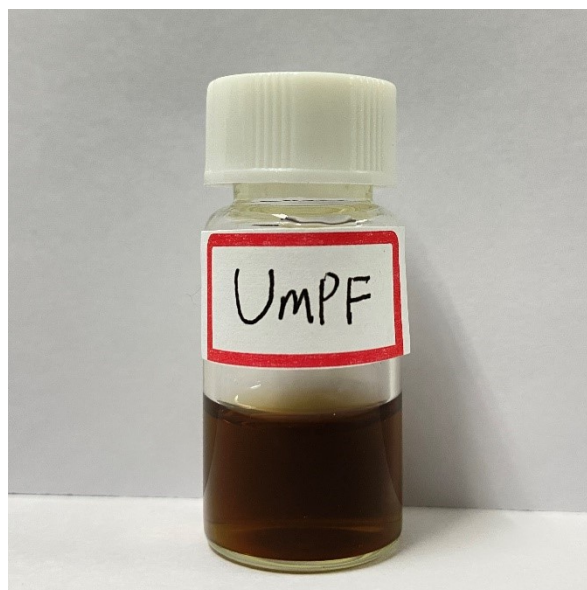

**Figure S1.** Digital photo of UmPF (800  $\mu\text{g}/\text{mL}$ ) water dispersion

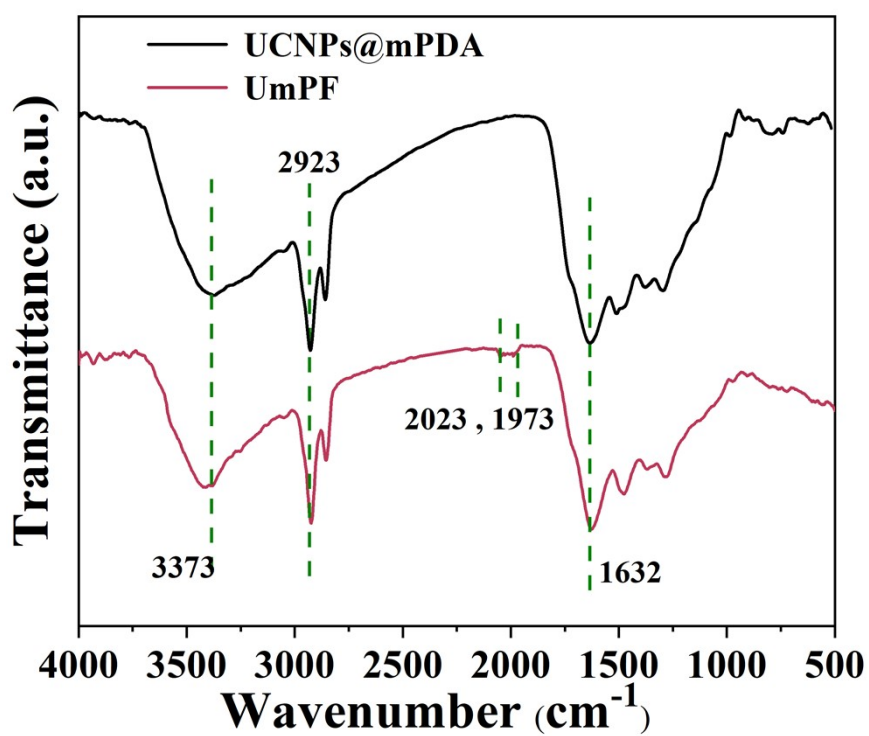

**Figure S2.** FT-IR spectra of UCNPs@mPDA (black line) and UmPF nanoplateform (red line)

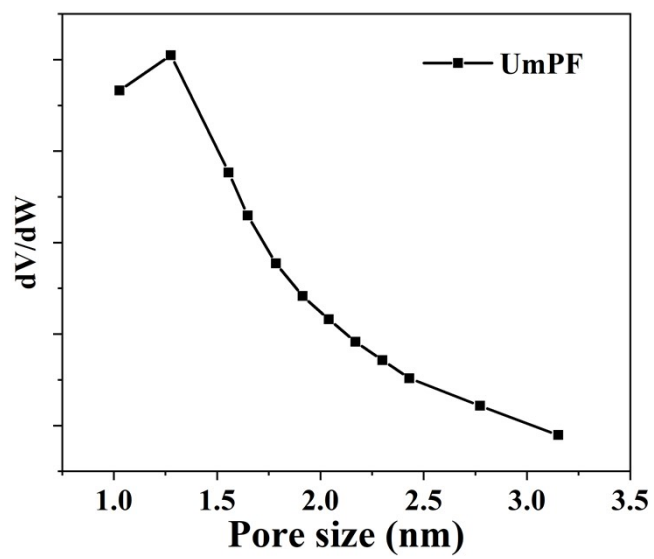

**Figure S3.** Pore size distribution of UmPF nanoplateform.

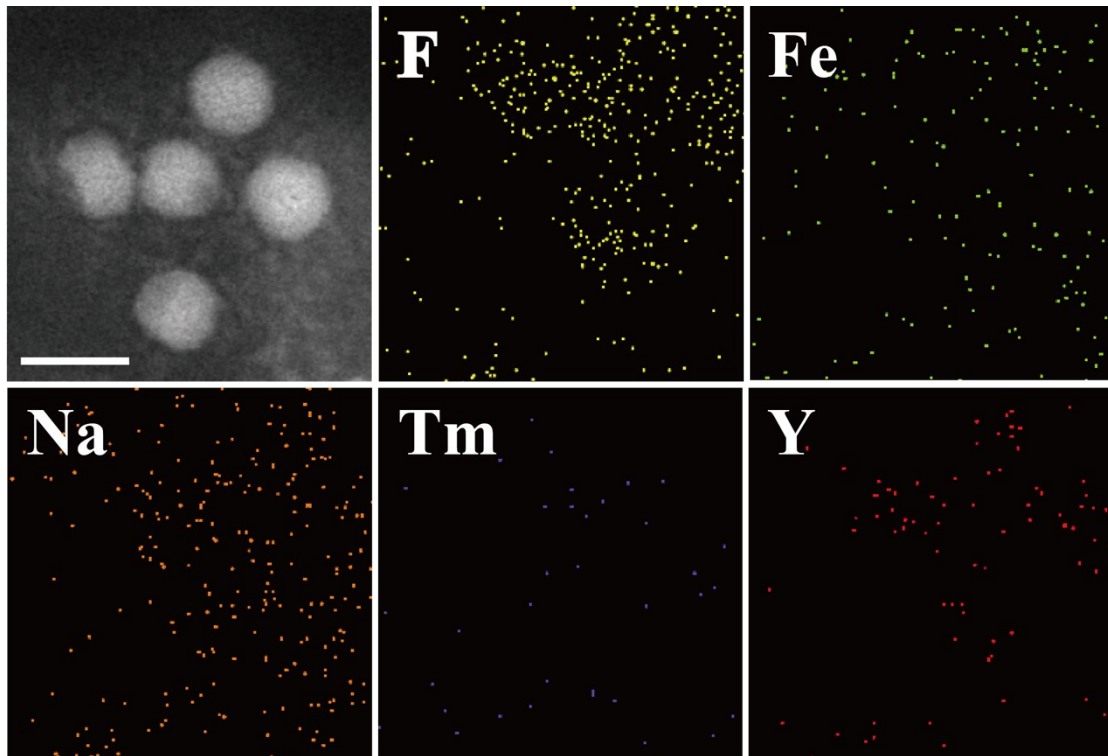

**Figure S4.** The corresponding elemental mapping images (elemental color distribution) of UmPF nanoplateform. Scale bar: 50 nm

UmPF is unstable under high current impact, it will collapse during the data collecting process, thus the elements distribution does not congregate as the regular shape. However, Figure S4 can still solidate the existence of Fe element, which substantiates the successful loading of  $\text{Fe}(\text{CO})_5$  in UmPF.

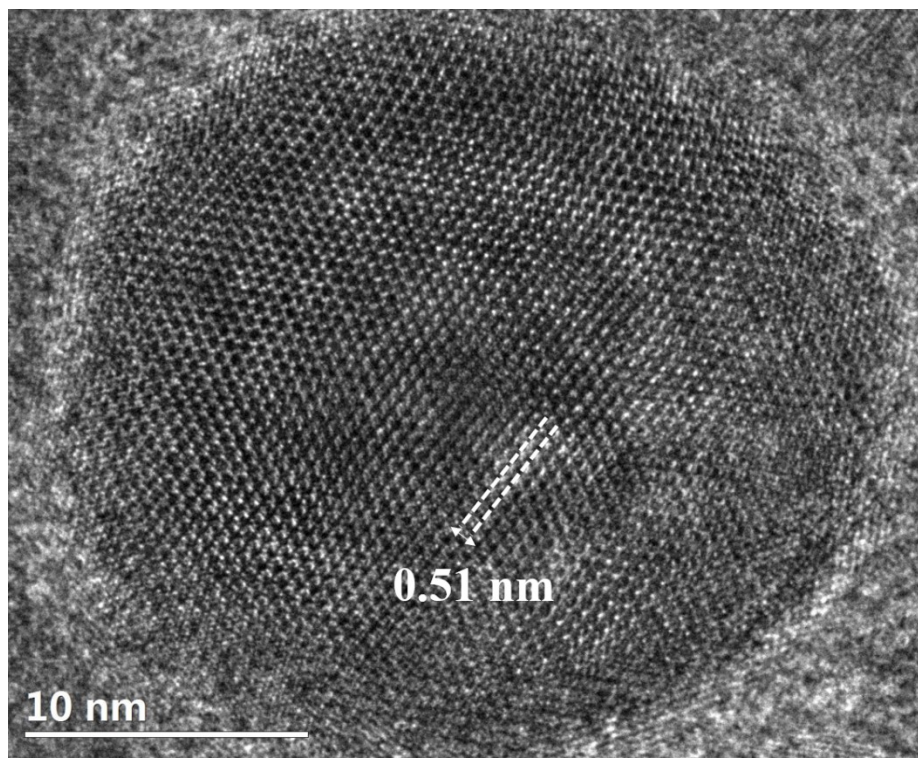

**Figure S5.** High Resolution Transmission Electron Microscope (HRTEM) of UmPF nanoplateform and its interplanar space.

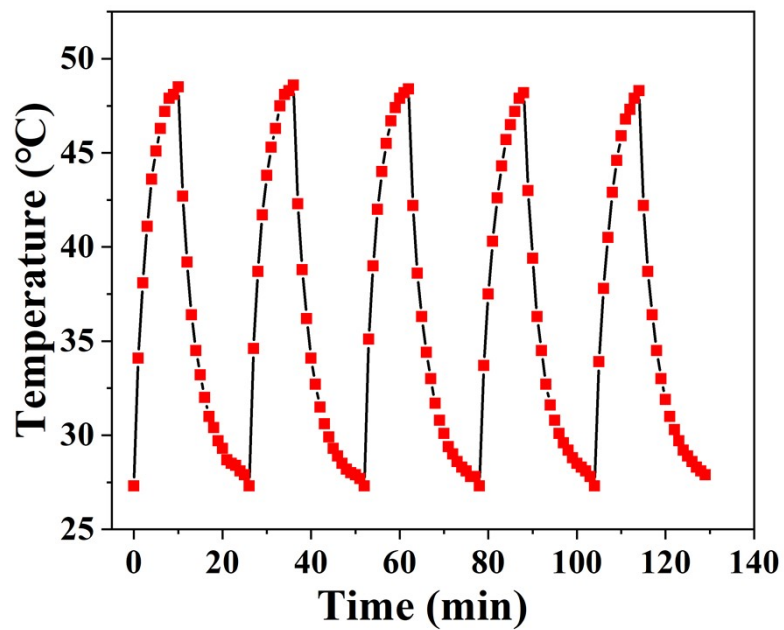

**Figure S6.** Photothermal stability test of UmPF nanoplateform. The UmPF water dispersion (400  $\mu\text{g}/\text{mL}$ ) was irradiated under 980 nm laser (1.5  $\text{W}/\text{cm}^2$ ) for 5 min, then cool it down to the room temperature naturally, repeat for 5 times.

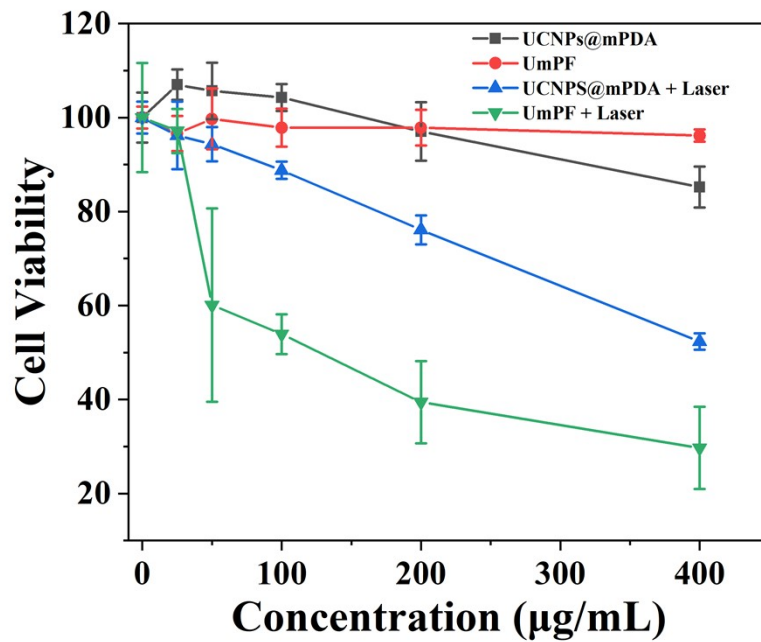

**Figure S7.** Cell viabilities of HeLa cells incubated with UCNPs@mPDA and UmPF, as well as plus laser irradiation for 10 min, respectively (980 nm laser, 1.5W/cm<sup>2</sup>).



In order to calculate the concentration of the released CO, the Lambert-Beer law was used to quantify the concentration of HbCO:

$$\frac{I^{410nm}}{I^{430nm}} = \frac{\epsilon_{Hb410nm} * (1 - x) + \epsilon_{HbCO410nm} * x}{\epsilon_{Hb430nm} * (1 - x) + \epsilon_{HbCO430nm} * x}$$

$$x = \frac{\epsilon_{Hb430nm} * I^{410nm} - \epsilon_{Hb410nm} * I^{430nm}}{(\epsilon_{Hb430nm} - \epsilon_{HbCO430nm}) * I^{410nm} - (\epsilon_{Hb410nm} - \epsilon_{HbCO410nm}) * I^{430nm}}$$

$I^{410nm}$  and  $I^{430nm}$  represents the intensities of the collected UV absorbance spectrum at 410 nm and 430 nm, respectively.

According to references (E. Antonini, M. Brunori, Hemoglobin and myoglobin in their reactions with ligands. Amsterdam, Netherlands: North Holland Publishing Company; 1971a. Solution properties of myoglobin and hemoglobin; pp. 98-134.)

$$\epsilon_{Hb430nm} - \epsilon_{HbCO430nm} = 216.5 \text{ mM}^{-1} \text{ cm}^{-1}$$

$$\epsilon_{Hb410nm} - \epsilon_{HbCO410nm} = -442.4 \text{ mM}^{-1} \text{ cm}^{-1}$$

$$\epsilon_{Hb430nm} = 528.6 \text{ mM}^{-1} \text{ cm}^{-1}$$

$$\epsilon_{Hb410nm} = 304 \text{ mM}^{-1} \text{ cm}^{-1}$$

[<http://omlc.org/spectra/hemoglobin/summary.html>]

$$\therefore C_{CO} = C_{Hb} * x = \frac{528.6 * I^{410nm} - 304 * I^{430nm}}{216.5 * I^{410nm} + 442.4 * I^{430nm}} * C_{Hb}$$
